# Supplementary figures and images for: Stepwise photothermal therapy and chemotherapy by composite scaffolds of gold nanoparticles, BP nanosheets and gelatin immobilized with doxorubicin-loaded thermosensitive liposomes
Source: Royal Society of Chemistry journal article supplement (doi:10.1039/d2bm01155g), 2022-01-01

**Differential intensity (a.u.)**

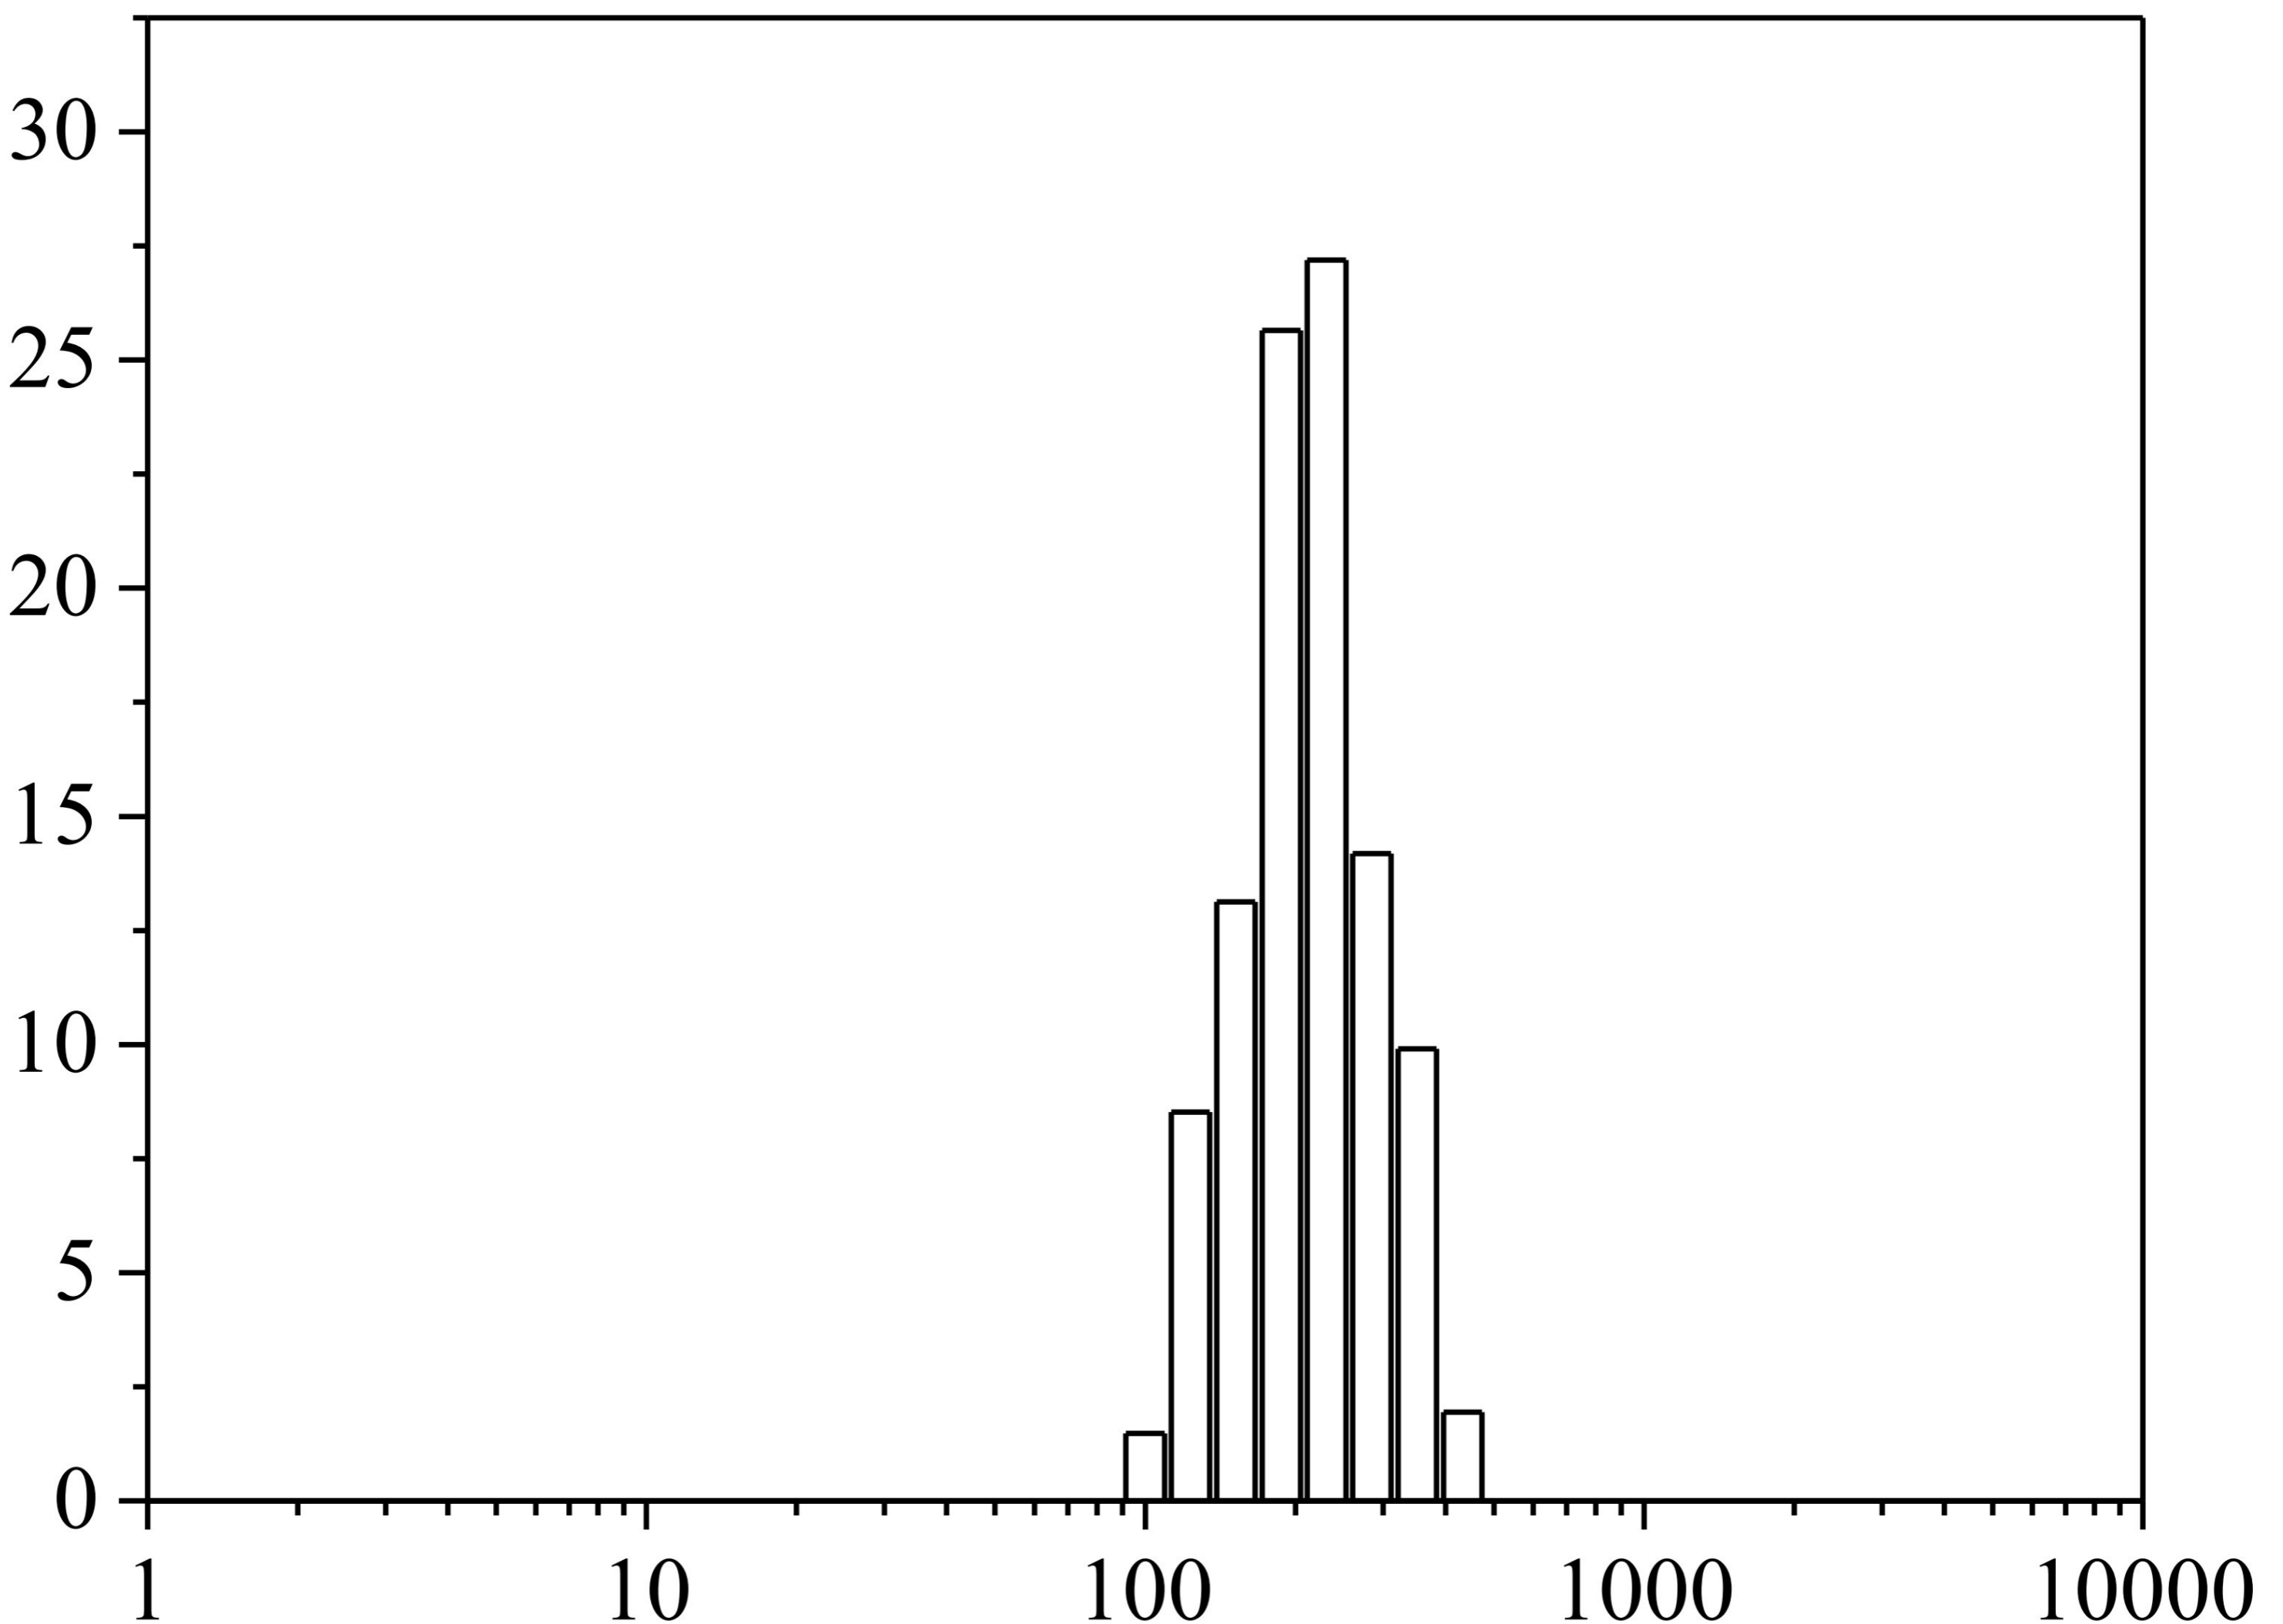

**Diameter (nm)**

Supplement: d2bm01155g2.pdf [file d2bm01155g2.pdf]
